# Supplementary material for: Aberrant Activation of the RANK Signaling Receptor Induces Murine Salivary Gland Tumors
Source: PubMed Central journal article supplement (PMC4464738; doi:10.1371/journal.pone.0128467), 2015-06-10

R

RANKL WESTERN

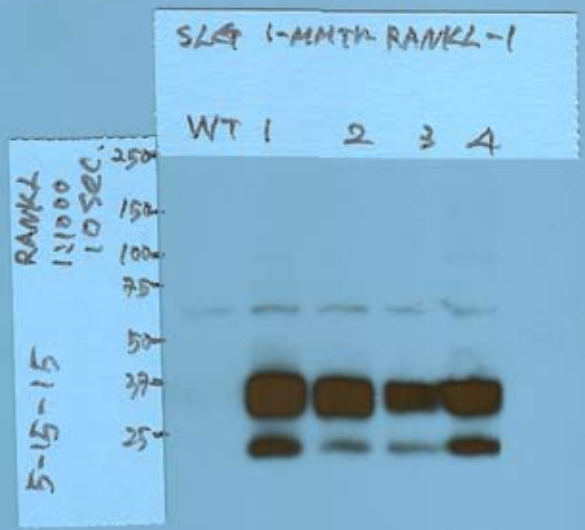

CYCLIN D1 WESTERN

CD1  
20 sec.

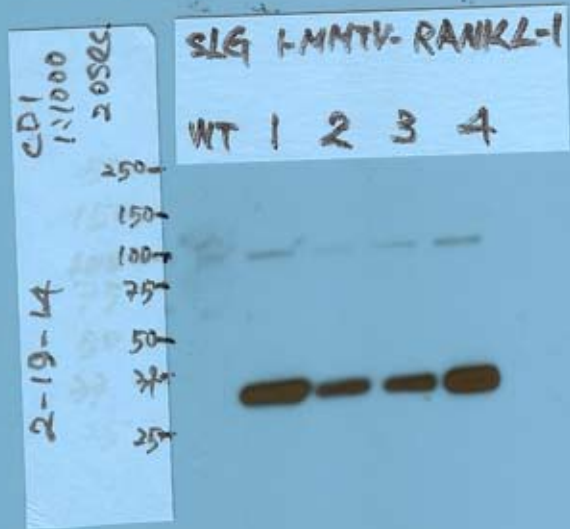

PCNA WESTERN

PCNA

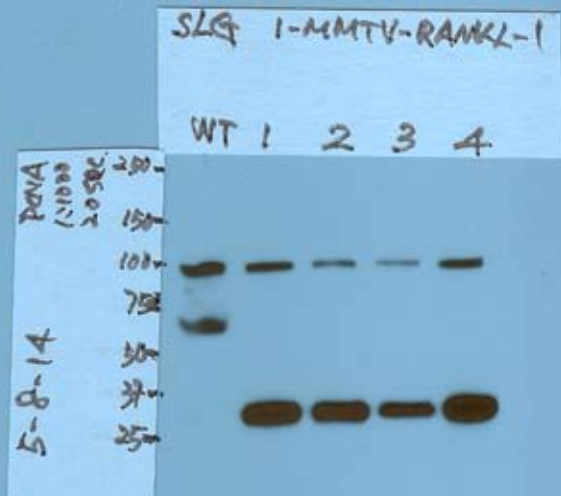

$\beta$ -Actin  
5sec.

4-23-14

250  
150  
100  
75  
50  
37  
25

SLG 1-MMTV-RANKL-1

WT 1 2 3 4

BETA-ACTIN WESTERN

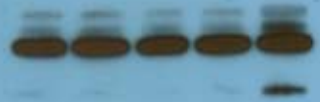

Supplement: pone.0128467.s008.pdf [file pone.0128467.s008.pdf]
