# Supplementary material for: Aberrant Activation of the RANK Signaling Receptor Induces Murine Salivary Gland Tumors
Source: PubMed Central journal article supplement (PMC4464738; doi:10.1371/journal.pone.0128467), 2015-06-10

ZEB-1 WESTERN

ZEB1 1:1000  
10 Min

SLG 1-MMTV-RANKL-1

WT 1 2 3 4

ZEB1 1:1000  
4-18-14  
10 Min

250  
150  
100  
75  
50  
37  
25

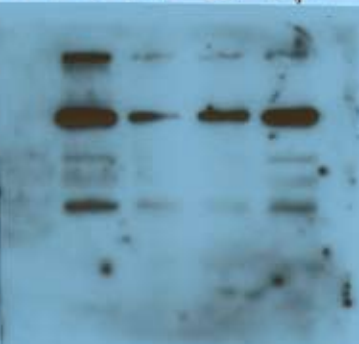

P63 WESTERN

SLG 1-MMTV-RANKL-1

WT 1 2 3 4

6-4-14  
P-63  
1:1000  
1D SEC.

250  
150  
100  
75  
50  
37  
25

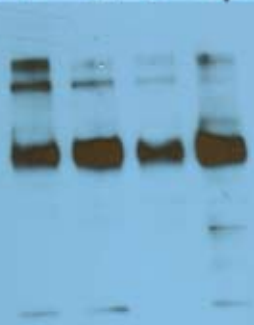

VIMENTIN WESTERN

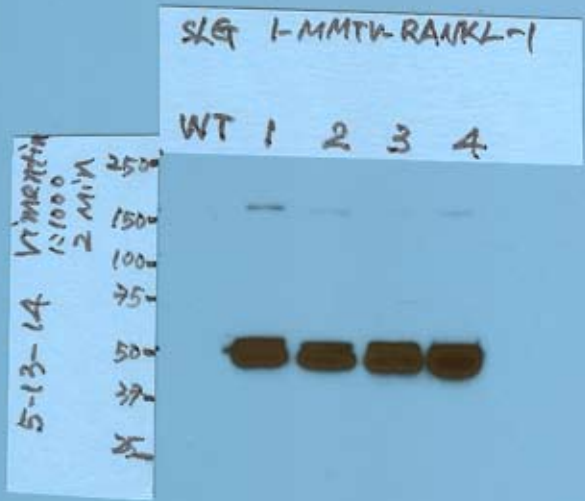

SNAIL SLUG WESTERN

snail/slug  
10 min

SLG 1-MMTV-RANK1

WT 1 2 3 4

snail/slug  
1:1000  
10 min  
2-19-14

250-  
150-  
100-  
75-  
50-  
37-  
25-

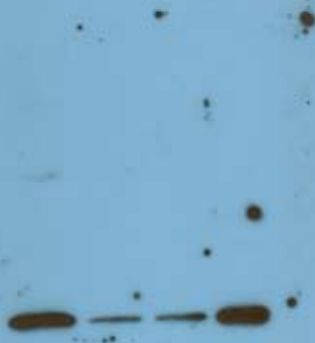

BETA-ACTIN WESTERN

4-23-14  
β-Actin  
5Sec.

SLG 1-MMTV-RANKL-1  
WT 1 2 3 4

250  
150  
100  
75  
50  
37  
25

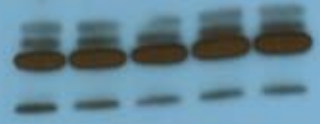

Supplement: pone.0128467.s009.pdf [file pone.0128467.s009.pdf]
